# Supplementary material for: The Road More Travelled: The Differential Effects of Spatial Experience in Young and Elderly Participants
Source: PubMed Central journal article supplement (PMC7830856; doi:10.3390/ijerph18020709), 2021-01-15
Supplement: ijerph-18-00709-s001.pdf [file ijerph-18-00709-s001.pdf]

**Table S1.** Correlation Matrix.

|                                 | <i>AGE</i> | <i>GENDER</i> | <i>EDUCATION</i> | <i>COGNITIVE FUNCTION-ING</i> | <i>RESIDENTIAL LOCATION</i> | <i>INCOME</i> | <i>MODE OF EXPLORATION</i> | <i>FREQUENCY OF EXPLORATION</i> | <i>COORDINATE</i> | <i>CATEGORY</i> |
|---------------------------------|------------|---------------|------------------|-------------------------------|-----------------------------|---------------|----------------------------|---------------------------------|-------------------|-----------------|
| <i>AGE</i>                      | 1          |               |                  |                               |                             |               |                            |                                 |                   |                 |
| <i>GENDER</i>                   | -0.010     | 1             |                  |                               |                             |               |                            |                                 |                   |                 |
| <i>EDUCATION</i>                | 0.532***   | 0.073         | 1                |                               |                             |               |                            |                                 |                   |                 |
| <i>COGNITIVE FUNCTION-ING</i>   | 0.680***   | 0,101         | 0.573***         | 1                             |                             |               |                            |                                 |                   |                 |
| <i>RESIDENTIAL LOCATION</i>     | -0.063     | -0.027        | -0.152**         | -0.062                        | 1                           |               |                            |                                 |                   |                 |
| <i>INCOME</i>                   | 0.137**    | -0.024        | 0.155**          | 0.106*                        | -0.523***                   | 1             |                            |                                 |                   |                 |
| <i>MODE OF EXPLORATION</i>      | 0.045      | -0.045        | 0.034            | 0.042                         | 0.072                       | -0.017        | 1                          |                                 |                   |                 |
| <i>FREQUENCY OF EXPLORATION</i> | 0.145**    | -0.115*       | 0.288**          | 0.190**                       | 0.039                       | -0.013        | 0.130**                    | 1                               |                   |                 |
| <i>COORDINATE</i>               | 0.362**    | 0.084         | 0.386**          | 0.379**                       | 0.043                       | 0.013         | 0.092                      | 0.553***                        | 1                 |                 |
| <i>CATEGORY</i>                 | 0.275**    | -0.075        | 0.298***         | 0.277***                      | 0.063                       | 0.014         | 0.072                      | 0.572***                        | 0.872***          | 1               |

Note: \* p < .05, \*\* p < .01, \*\*\* p < .001; § the variable Age is encoded as follows: young=1, elderly=-1.

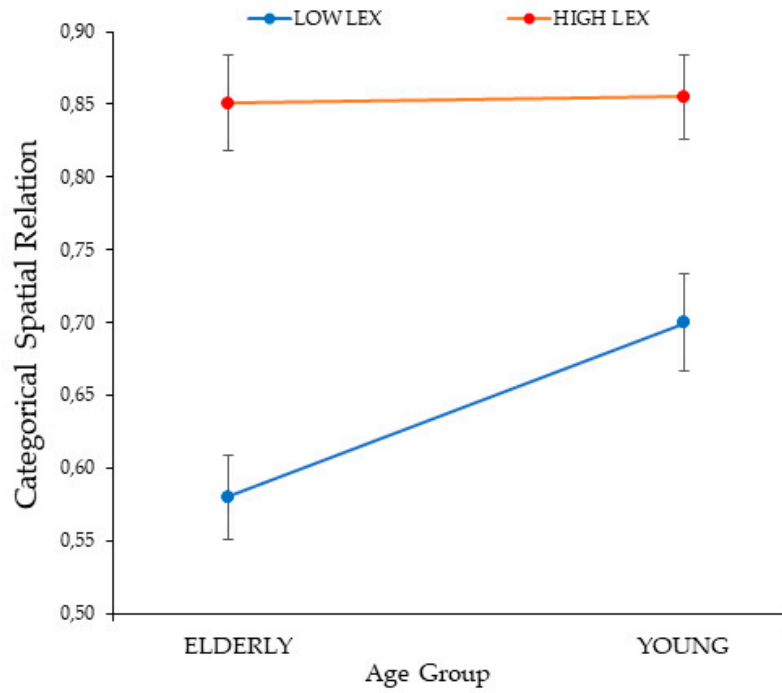

**Figure S1.** A line graph depicting the interaction effect between the Level of Experience Index (LEX) and Age Group on categorical spatial relation (Model 1).

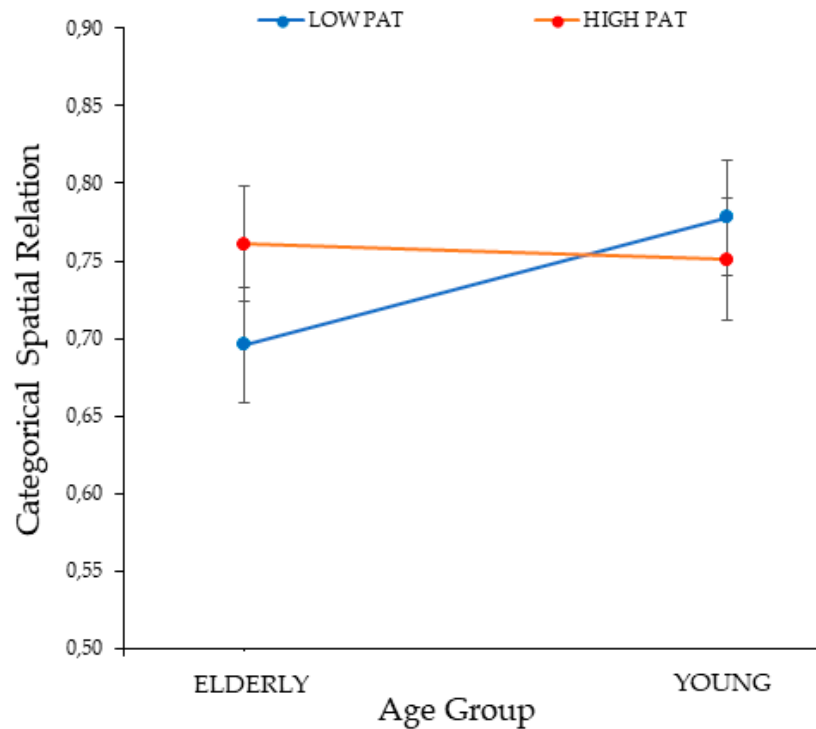

**Figure 2.** A line graph depicting the interaction effect between the Passive Active Transportation index (PAT) and Age Group on categorical spatial relation (Model 2).

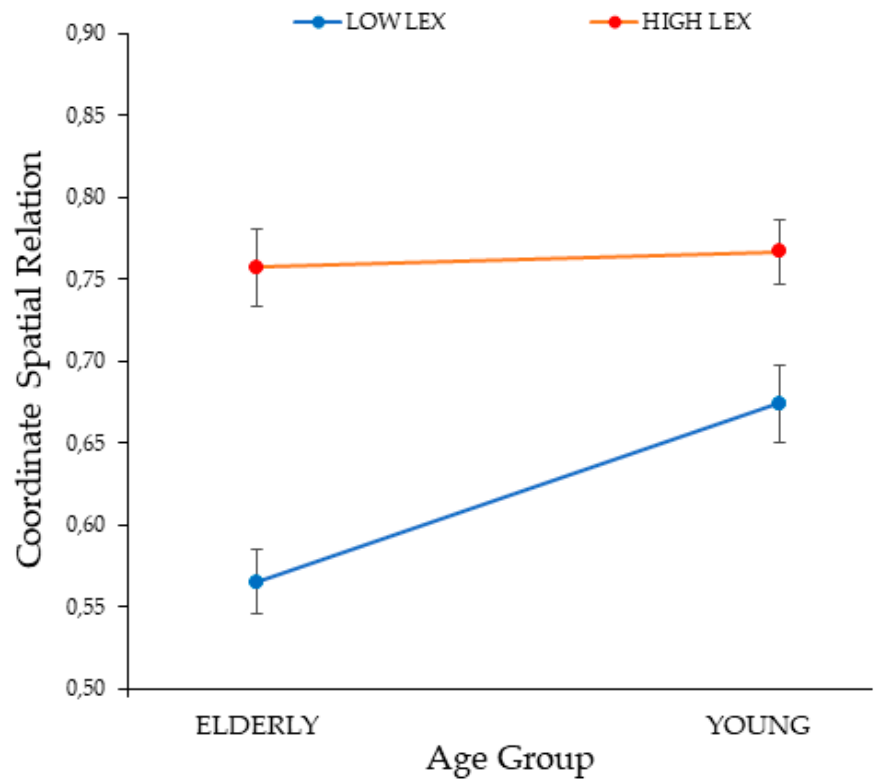

**Figure S3.** A line graph depicting the interaction effect between the Level of Experience Index (LEX) and Age Group on coordinate spatial relation (Model 3).

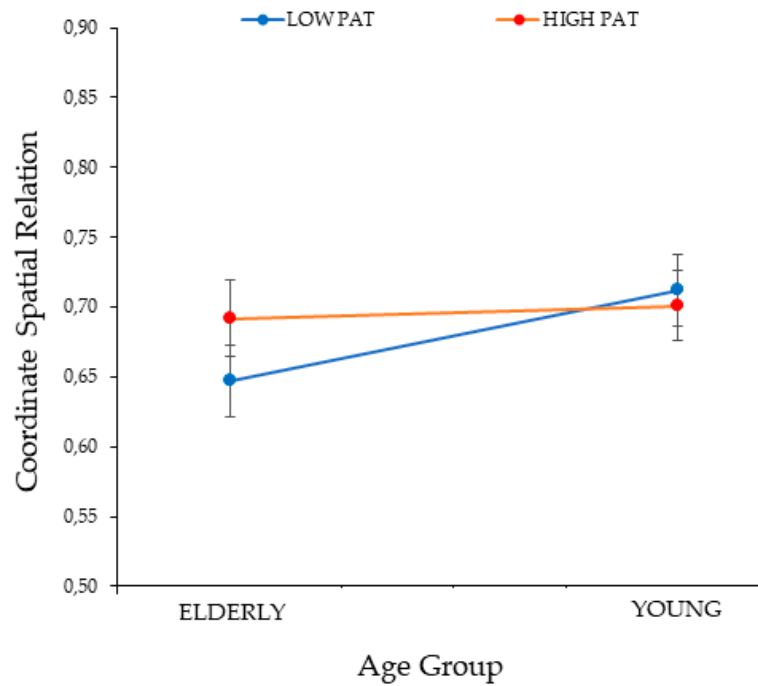

**Figure S4.** A line graph depicting the interaction effect between the Passive Active Transportation index (PAT) and Age Group on coordinate spatial relation (Model 4).
